# Supplementary material for: BrWRKY65, a WRKY Transcription Factor, Is Involved in Regulating Three Leaf Senescence-Associated Genes in Chinese Flowering Cabbage
Source: PubMed Central journal article supplement (PMC5486051; doi:10.3390/ijms18061228), 2017-06-08
Supplement: ijms-18-01228-s001.pdf [file ijms-18-01228-s001.pdf]

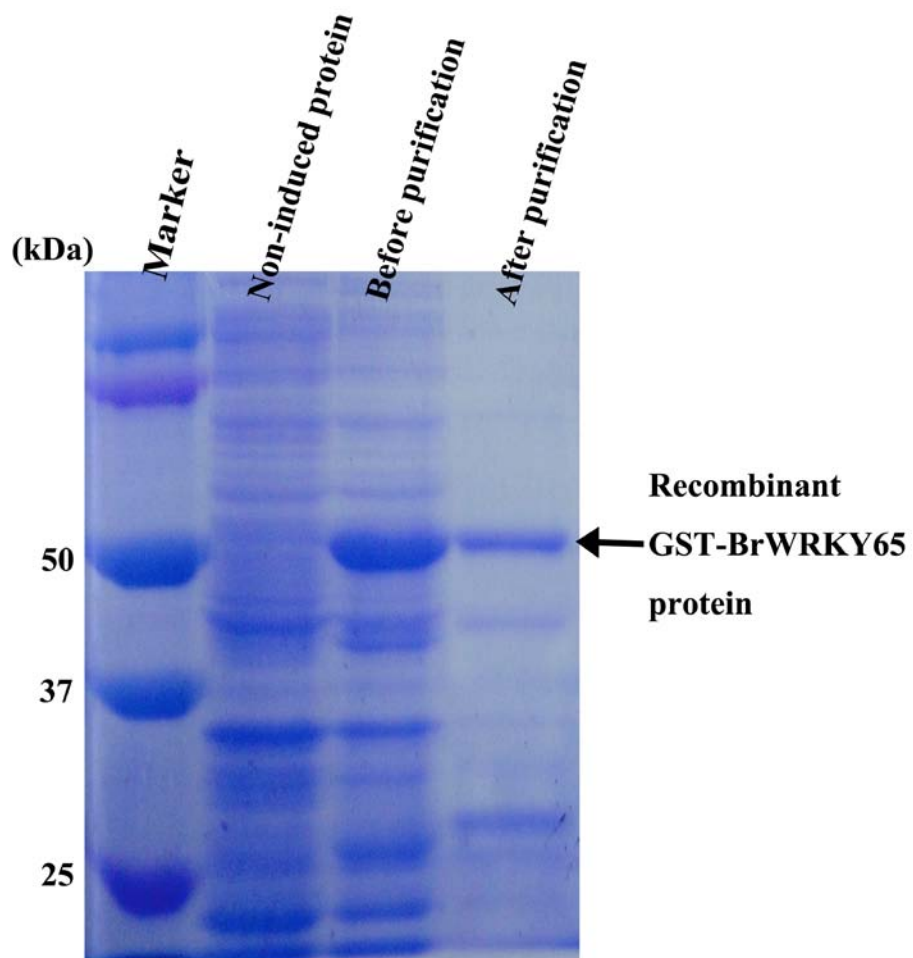

**Figure S1.** SDS-PAGE gel stained with coomassie blue demonstrating affinity purification of the recombinant GST-BrWRKY65 protein used for the EMSA assay.

**Table S1.** Summary of primers used in this study.

| Assay                    | Primer sequence                            |                                              | Restriction Site        |
|--------------------------|--------------------------------------------|----------------------------------------------|-------------------------|
| RT-qPCR                  |                                            | Forward primer(5'-3')                        | Reverse primer(5'-3')   |
|                          | <i>BrWRKY65</i>                            | CGGCACAAAGGAGACACA                           | TGCTTCTCTCGACTTGCTTC    |
|                          | <i>BrNYC1</i>                              | GATGTCTGGAACACCGCCTC                         | TTCTCACGCTTTCTCCGTCTTT  |
|                          | <i>BrSGR1</i>                              | CAAAGCTCCCAAGAACTTACTC                       | AGATTCTGTAGCTCAGGGTAACT |
|                          | <i>BrDIN1</i>                              | GAAACTACCAACGGCGACAAGAAG                     | CCGGTGTCTCACGTCCAGA     |
| Subcellular localization | <i>BrWRKY65-GFPFor</i>                     | ttctcccaaatcgcg ATGAAGCGAGGTCTAGATAT         | <i>NruI</i>             |
|                          | <i>BrWRKY65-GFPRev</i>                     | tagtcataccggtcgc AAAGATCTCAACCTGTGACCCAAC    | <i>NruI</i>             |
| Fusing GST               | <i>pGEX-4T-1-BrWRKY65-For</i>              | ggttcgcgctgatcc ATGAAGCGAGGTCTAGATAT         | <i>BamHI</i>            |
|                          | <i>pGEX-4T-1-BrWRKY65-Rev</i>              | agtcacgatcggcgcg TCAAAAGATCTCAACCTGTGA       | <i>NotI</i>             |
| Dual LUC assay           | <i>pBD-BrWRKY65For</i>                     | tcgccgaccgtagcct ATGAAGCGAGGTCTAGATAT        | <i>Stu I</i>            |
|                          | <i>pBD-BrWRKY65Rev</i>                     | aaccagagttaaaggcct AAAGATCTCAACCTGTGACCCAAC  | <i>Stu I</i>            |
|                          | <i>62sk-BrWRKY65For</i>                    | tagaactagtgatcc ATGAAGCGAGGTCTAGATAT         | <i>BamHI</i>            |
|                          | <i>62sk-BrWRKY65Rev</i>                    | cggtatcgataagcct TCAAAAGATCTCAACCTGTGACCC    | <i>HindIII</i>          |
|                          | <i>0800-BrNYC1proIFor</i>                  | tatagggcgaattgg GATTTAGAACAAGCCAGATCGCCA     | <i>KpnI</i>             |
|                          | <i>0800-BrNYC1proRev</i>                   | ttggcgtcttccatgg AGCTAAACCAGAGAGTGAGAAGAGGAG | <i>NcoI</i>             |
|                          | <i>0800-BrSGR1proFor</i>                   | tatagggcgaattgg ATAGATAAGTCCGACCGAAGCC       | <i>KpnI</i>             |
|                          | <i>0800-BrSGR1proRev</i>                   | ttggcgtcttccatgg CTCTGCTTCGTTTCAATATCAGTA    | <i>NcoI</i>             |
|                          | <i>0800-BrDIN1proFor</i>                   | tatagggcgaattgg GCAGACACTAGGCAATAAAGGCAC     | <i>KpnI</i>             |
| <i>0800-BrDIN1proRev</i> | ttggcgtcttccatgg TATACAGACACAAAGCCAAAGGATA | <i>NcoI</i>                                  |                         |

**Text S1.** Promoter nucleotide sequences of *BrNYCI*, *BrSGRI* and *BrDINI*. W-box (C/T)TGAC(C/T) is marked by red and boxed. Translation start site (ATG) was shown in yellow box.

*BrNYCI* (XP\_009139641.1) promoter

GATTTAGAACAAGCCAGATCGCCAGATTGCAGTGACGG**TTGACT**TGAATAAAGAAAAATGAAAAAGCAGATAAA  
TGCAAAGTTTCTAAGATGAGGATAAGAAAACTCTCCGCAAATTAAGAAAGACGGCCGACCTTGGAGGTGTATA  
CAAAGACACCTTAGGCCAAGAGGACGAGGGACATAATTTTTTTTGTAGAACTTAGCACTAGAGTAATTTTAGGCAAT  
TTTGTGTTGTTATCGAACTGCGACTCAAAGAGATTTAAGGCTTCAGATGGTTAGAACTATAGAACTCACTCACAG  
CTCTTGCGACCGTAGCTTTTACAACCTTGTGTAACAATCACAACGCTCTTAAGCGGATTTGAAATAGGAGCTGTTCT  
TCATTGATTTTTCTTTCTGTTTCGGACTGGATAAAAATAAATTTTCTTCGTCTCTCCTCTTTTACTTTGATGTGTGTT  
TGATACTTTGATTCAAGAGACACCACCACGTCGTCGCTGTCTCGTTGATCTTCTTCTGTTTTGTTGGTCATGCTCAC  
TCTCTATTTCCAGAGAAATCAATCTTTGCAATTAAGAAGATGTTCCGGCAAAGTATTTTGAAGGATAGAGTGTTGA  
GATTTGCATAATAGTTTCTCTGATTTAAATCAGTTTAAACGAATTCAAAGCTTGTTTATGCAAGTGTTTTGACAATGA  
ATGTTCTCAAATCGATTGAACTTTTTGGAGTTTATCACATCCACAGAAGAGTTTGAACATTTATTAGAAGCGCCAA  
GGAGAGTTAAGACTGGTTTTTGGGCATTGATATCACGGTAGAGAAAATAAATTGGATTGGGATTTGATCATAACAGGT  
CTAACTACCGAACTGCTTTCTACCTACCAAAGACTTTTTGTTAATTTGTAAAGCCAAAACCTTGCAATCGAAGCC  
CAAACCTTGCAATCGAAGCCCAAGGGCTAGATAGATTAATATCCGGTTGACAAAAGAAAAACGAAGCTAGCTTC  
CAAAGAAAAATCGTAAACATGTTAATCGGCCAAAAAATAAATAAACAAGTGGCACGTGTCATTGTTGGGCA  
AACGAGATGAGGTTGCCGTAACGTGTGGTCATCACACTTCTTTCCTTCTTCTTTTCCACCACCTCCTTTCTT  
CGTCTCATCTCTTTCCTTCTCCGATCTATATTTAACTTCTTCGACGACTACGAAGATTAATAAATATCTAATCTTTTGT  
GTTACCCACAAGAAAAGATATATATCTTTCTTTTATCTTCTTCTTGTACGATATTTTGCATGAGATTTTAAAA**CTCC**  
TCTTCTCACTCTCTGGTTTAGCT**ATG**

*BrSGRI* (XP\_018512704.1) promoter

ATAGATAAGTTCCGACCGAAGCCGCAACGTACAGAATTGTTTCTAAATATTCGGCGAACCGCTTGTCTCTTTGTCCC  
GAAAGGTAGTGTATTATCTGATAACGAATCGAAGAGAACTCGTCAACGCTACGTTTGTGCTTTAATGAGACGACAC  
ATGCCAACTCATGCAGTGAAGAAGCTGGACACCAACGTGTAACCTCACAGCTTACCTCGTCAGAGCGGATTTTGG  
ACTTGTGTAAAGTCTACAAATAGAAGCAACCTTCACTTTTCACTCGTATCGTAAGATTG**TTGACT**CCAACACGCAA  
ACAACAAAAAGAAAAACAAAAAGAAAAACCTAATTTTCTGGAAGATAAAGCTTAACGGAAAGCGAAAGCAAGCT  
CGTTTTTTTTTAAGGGCTTCCAGCTTTTGATATTGTGGGTTTTACGAACCGCAATAATAGCGTGAGACGTTAATATAG  
TTTTTCTTTTATTTAAGGATTGTATTTTCTTTCAGTCTTGTTTTTTACAGATACTGATATTGAAACGAAGCAGAG**ATG**

*BrDINI* (XP\_009150416.1) promoter

GCAGACACTAGGCAATAAAGGCACGATGACCCCGAGAGCTTGGTGCTAAGGATATACAGGAAGTACGCACTAGCA  
GATGCCATTGTAGTTGTGGCCGCAAATAACGCAAACGCCGTTGGTCTTA**CTGACT**CCAAAGGGTAAATTCCCTT  
CCCCAAGCTGTGTACTCAAAGCTGTTACTAAGCCATACATAACAAACCAATCACTGGCAAAGGAACACCTGGAG  
AAATGCAAAAGAACAGTCACTTAGTTCAGCTTTCAACATGGAGCATGCTATTTCATTGACACAGCTCATAGCACAGA  
TTCAAGATTATATCGCATTGAGAGTGATTCAATCAGAATCTAATCATGCCTATGAGATCAAATACCATGAATACAAAT  
CTTGAACATAAGCTACATAAAGTTTCCAGGTTAATCTAAGCTCAAGACTACATTAATCACCCTAGTGTATAGTACC  
AAAAACAAGGGCGTAATCGCTGTTCAATACATCGCCGCAAGTACCACCACCAACGGGGCAAAGGCATCGGAGCC  
AGTGAGTTTCAGGTAGGTTAAATACGCGGTGTCTAACATCCCGATACCGCCGAGTCCGGTGAACCAGCTGTATGTC  
GAACTGTTAATAGATAACCGAATCTACACCATCATCCGACTCAGATGACGAGCATTGATCGAAAATCTCCGGCGAG  
AGACCTGATTAAGAACAT**CTGACT**TCAATTAACCAATCACACTACCATCACACACGAAAATGAAACGAGATTTAC  
CTCGAAACGTCTTGGATTGAGAGACGACGACGAAGGAGGAAGCTCACGGAAGCCGAAACGAAACTGACAAGAC  
GATACAGGGATAAACCTCGCCATCATCGTCGTCGTTGAACAATCGCTAATCCAACATCATCGAAAAGCTTCCCTCA  
ACTTTCCTCCCTTCCGTTTCGTTAATGGGCCTAAGGCAAGGCCATCTAGTATTAAGAGCTGGGCCTAATAAGAAA

CGTATAGTAGCATCTAATCCG **AGTCAG** CAAGTTATCCATATTACGACTTACGAGGTAACCGAGTTGGACTTATCAAC  
TGATATCCATACTCCGCATGGCTTACATGTTGGACTCGGATAGATCTTCTAGAACTGGCTGACGTGTCAGTAGTTC  
ATATCCTTTGGCTTTGTGTCTGTATATATATACATAACATGCACGAGAAGTATAACTCAAAGTATCTACAAACACAAG  
AATAAAAA **ATG**
